# Supplementary material for: Optoelectronic properties of (ZnO)60 isomers
Source: Royal Society of Chemistry journal article supplement (doi:10.1039/c2cp42037f), 2012-01-01
Supplement: c2cp42037f.pdf [file c2cp42037f.pdf]

# Optoelectronic Properties of (ZnO)<sub>60</sub> Isomers

*(Supporting Information)*

Claudia Caddeo,<sup>\*,†,‡</sup> Giuliano Mallocci,<sup>‡</sup> Filippo De Angelis,<sup>¶</sup> Luciano Colombo,<sup>†,‡</sup>  
and Alessandro Mattoni<sup>\*,‡</sup>

*Dipartimento di Fisica Università di Cagliari, Istituto Officina dei Materiali del CNR, Unità  
Cagliari, Cittadella Universitaria, I-09042 Monserrato (Ca), Italy, and Istituto di Scienze e  
Tecnologie Molecolari del CNR, Computational Laboratory for Hybrid and Organic  
Photovoltaics, Via Elce di Sotto 8, 06123 Perugia, Italy*

E-mail: claudia.caddeo@dsf.unica.it; alessandro.mattoni@dsf.unica.it

---

\*To whom correspondence should be addressed

†University of Cagliari

‡CNR-IOM

¶ISTM-CNR

## 1 MPMD computational details

The MPMD simulations are performed using the DL\_POLY 3 code.<sup>1</sup> The interactions between atoms are described as the sum of electrostatic and Buckingham-type pair interaction potential.<sup>2,3</sup> All the electrostatic contributions are computed by the Ewald sum method with real space cutoff,  $\rho_c = 8$  Å. The atomic trajectories are calculated using the Velocity Verlet algorithm with a timestep as small as 0.5 fs. Temperature is controlled by the Berendsen thermostat with relaxation constant  $f = 0.5$  ps.

## 2 Additional DFT computational details

In all cases, the resolution of identity approximation is adopted for computing the electronic Coulomb interaction.<sup>4</sup> In addition, the multipole accelerated resolution of identity approximation<sup>5</sup> is used, enabling even more efficient calculations. In each SCF cycle, we require the energy to be converged within  $3 \cdot 10^{-6}$  eV and the grid for numerical evaluation of the exchange-correlation operator is set to medium size.<sup>6</sup> No symmetry restraint have been applied during the relaxations.

## 3 Additional data

Table 1 reports a series of data on the ZnO isolated molecule as calculated with the BP86/TZVP scheme in comparison with other first principles results and available experimental data. In particular, column two reports very accurate Coupled Cluster (CC) data,<sup>7</sup> and column three reports the results obtained in Refs. 8,9. A very good agreement is found between our calculated properties and the corresponding experimental or CC data. In Figure 1 we report the optimized geometries of the hexagonal clusters, both unsaturated and saturated with 6 (W6) and 7 (W7) water molecules. Next two figures show the density of states for all the six unsaturated isomers (Figure 2) and for the two saturated hexagonal clusters (Figure 3). Table 2 shows a comparison between the B3LYP eigenvalues of the hexagonal and sodalite isomers, calculated on the BP86 and B3LYP optimized

geometries. The two sets of data are consistent and differ only by a small rigid shift. Table 3 reports the energy of the highest occupied (HOMO) and lowest unoccupied (LUMO) molecular orbitals of the saturated and unsaturated clusters calculated with hybrid DFT, and the HOMO-LUMO gap, calculated both with hybrid DFT and TDDFT. The latter is calculated with both the SVP and 6-311G\* basis sets for the sodalite and hexagonal clusters. In Figures 4 and 5 we report the spatial distribution of HOMO and LUMO for all the unsaturated isomers. From Figure 6, which reports the first 10 occupied and unoccupied energy levels, one can easily see that the band gap is well opened and there are no intra-band states. The optical absorption spectra of the saturated and unsaturated hexagonal clusters are compared in Figure 7.

**Table 1: Comparison between calculated and experimental properties of the diatomic ZnO molecule. Bond lengths ( $r_b$ ) are in Å, energies (binding energy  $E_B$ , electron affinity EA and ionization energy IE) in eV and vibrational frequencies ( $\omega_v$ ) in  $\text{cm}^{-1}$ .**

|            | this work | CC <sup>a</sup> | PBE/DSPP/DND <sup>b</sup> | Exp               |
|------------|-----------|-----------------|---------------------------|-------------------|
| $r_b$      | 1.71      | 1.72            | 1.73                      | -                 |
| $E_B$      | 1.78      | 1.63            | 2.12                      | $1.61 \pm 0.04^c$ |
| $\omega_v$ | 742       | 727.2           | 665                       | $805 \pm 40^d$    |
| EA         | 2.21      | 2.03            | -                         | $2.09 \pm 0.1^d$  |
| IE         | 9.40      | -               | -                         | $9.34^d$          |

<sup>a</sup> From Ref. 7

<sup>b</sup> From Refs. 8,9

<sup>c</sup> From Ref. 10

<sup>d</sup> From Ref. 11

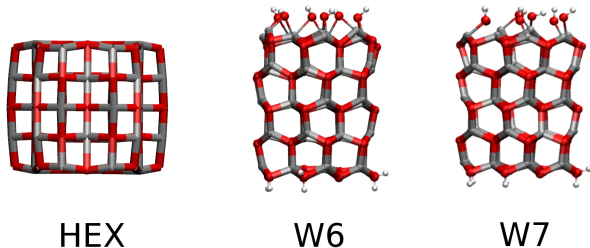

Figure 1: Optimized structures of the unsaturated hexagonal structure (HEX, left) and of its saturated counterparts: W6 (center) is saturated with 6 water molecules and W7 (right) with 7 water molecules.

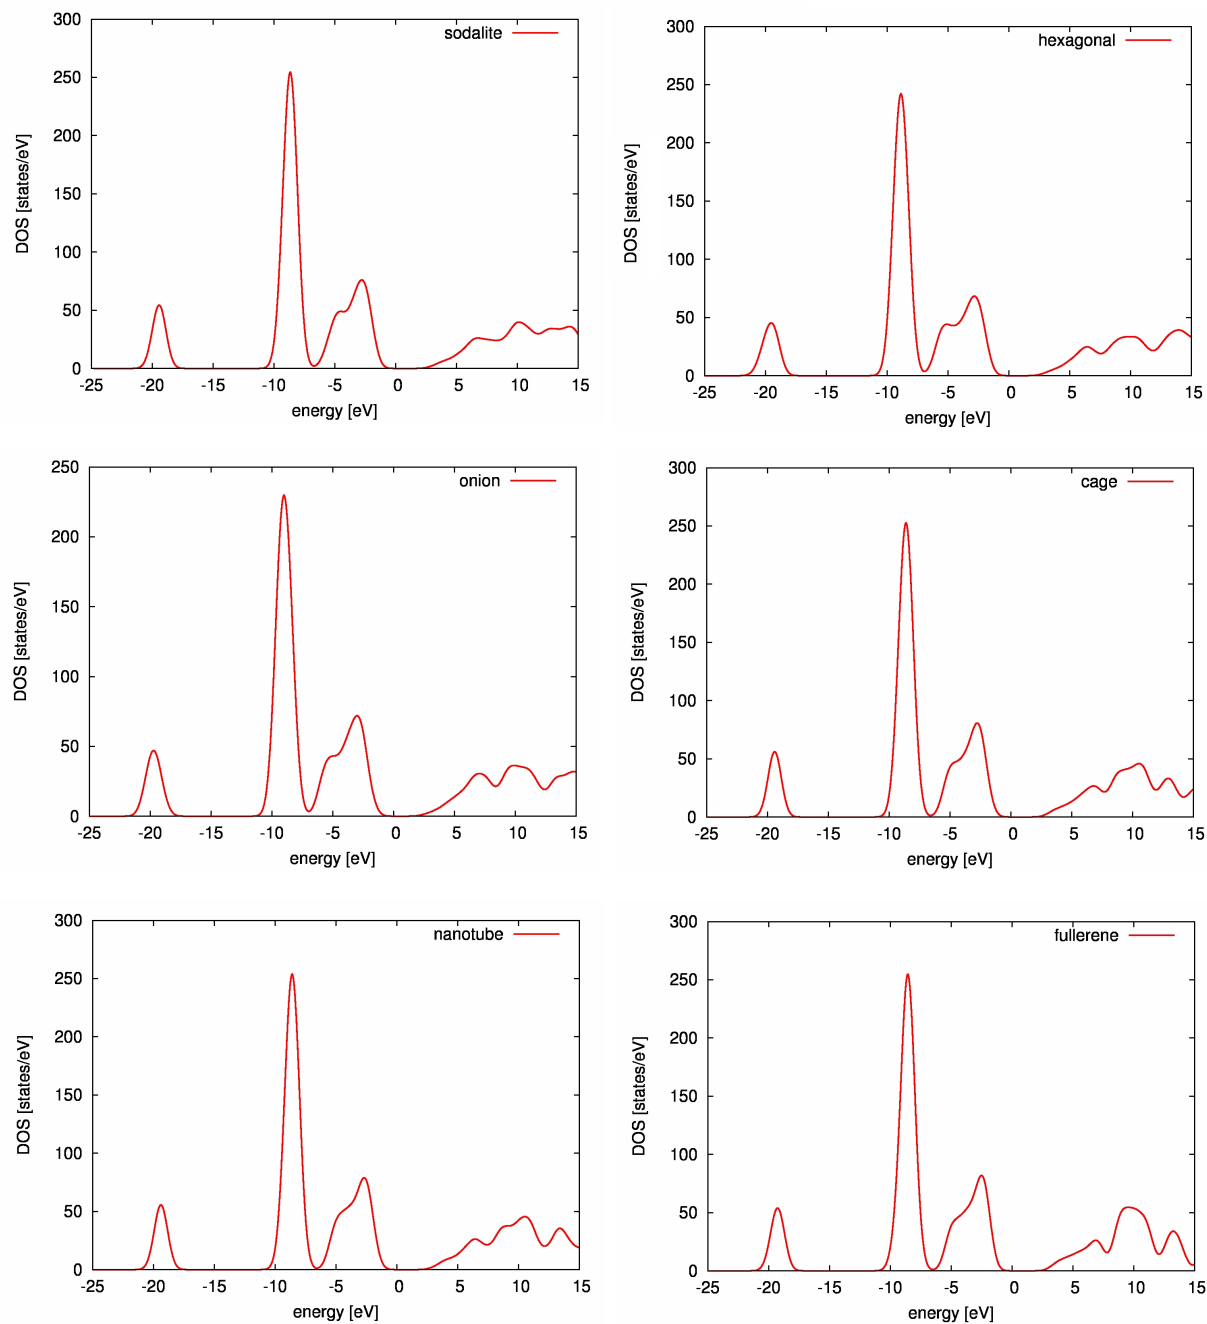

Figure 2: Density of states of the six isomers. Gaussian functions are plotted with arbitrary full width half maximum (FWHM) of 1.2 eV. The energy zero has been aligned to the Fermi energy.

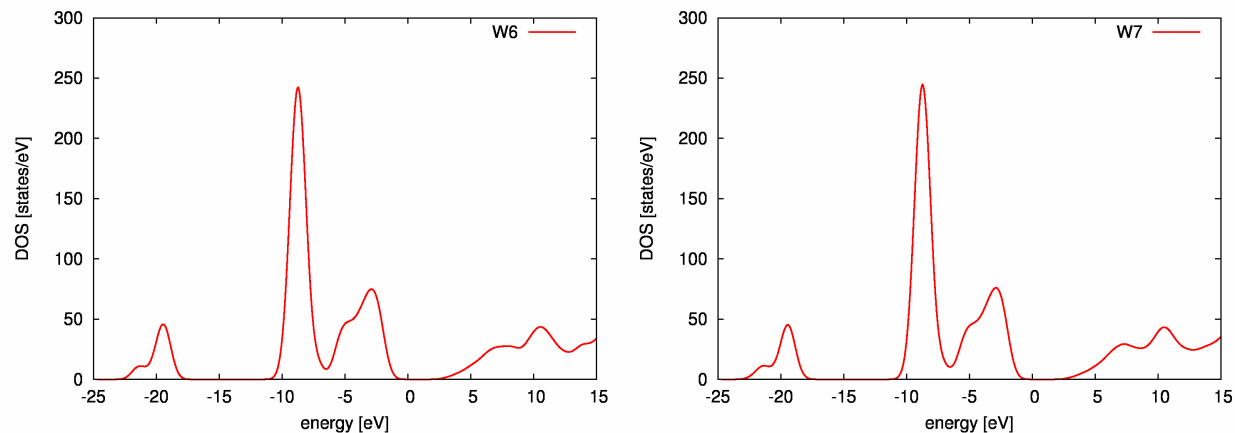

Figure 3: Same as Figure 2 for the two water saturated hexagonal nanoclusters.

**Table 2: B3LYP eigenvalues corresponding to first five unoccupied (top) and occupied (bottom) molecular orbitals, calculated on the BP86 and B3LYP optimized geometries. The last row reports the electronic gap. All values are in eV.**

| HEX        |            | SOD         |             |
|------------|------------|-------------|-------------|
| BP86       | B3LYP      | BP86        | B3LYP       |
| -0.63      | -0.46      | -1.00       | -0.90       |
| -1.17      | -0.90      | -1.24       | -1.12       |
| -1.17      | -0.90      | -1.57       | -1.48       |
| -1.31      | -1.06      | -1.57       | -1.48       |
| -1.90      | -1.58      | -2.11       | -2.02       |
| -6.69      | -6.37      | -7.11       | -7.06       |
| -6.69      | -6.37      | -7.12       | -7.07       |
| -6.69      | -6.37      | -7.12       | -7.07       |
| -6.72      | -6.37      | -7.13       | -7.10       |
| -6.72      | -6.39      | -7.13       | -7.11       |
| $E_g=4.79$ | $E_g=4.79$ | $E_g= 6.11$ | $E_g= 6.16$ |

**Table 3: First three columns: HOMO, LUMO and HOMO-LUMO gap of the considered isomers. Last two columns: optical gap as computed by B3LYP TDDFT with SVP and 6-311G\* basis sets, respectively. All values are in eV.**

| isomer    | DFT B3LYP |       |      | TDDFT (SVP) | TDDFT (6-311G*) |
|-----------|-----------|-------|------|-------------|-----------------|
|           | HOMO      | LUMO  | GAP  | GAP         | GAP             |
| sodalite  | -7.11     | -2.11 | 5.00 | 4.24        | 4.30            |
| hexagonal | -6.68     | -1.90 | 4.79 | 4.06        | 4.09            |
| onion     | -6.81     | -2.31 | 4.51 | 3.81        | -               |
| cage      | -6.53     | -1.53 | 5.00 | 4.37        | -               |
| nanotube  | -6.53     | -1.56 | 4.97 | 4.29        | -               |
| fullerene | -6.63     | -1.38 | 5.26 | 4.50        | -               |
| W6        | -7.10     | -2.15 | 4.95 | 4.26        | -               |
| W7        | -7.05     | -2.15 | 4.89 | 4.19        | -               |

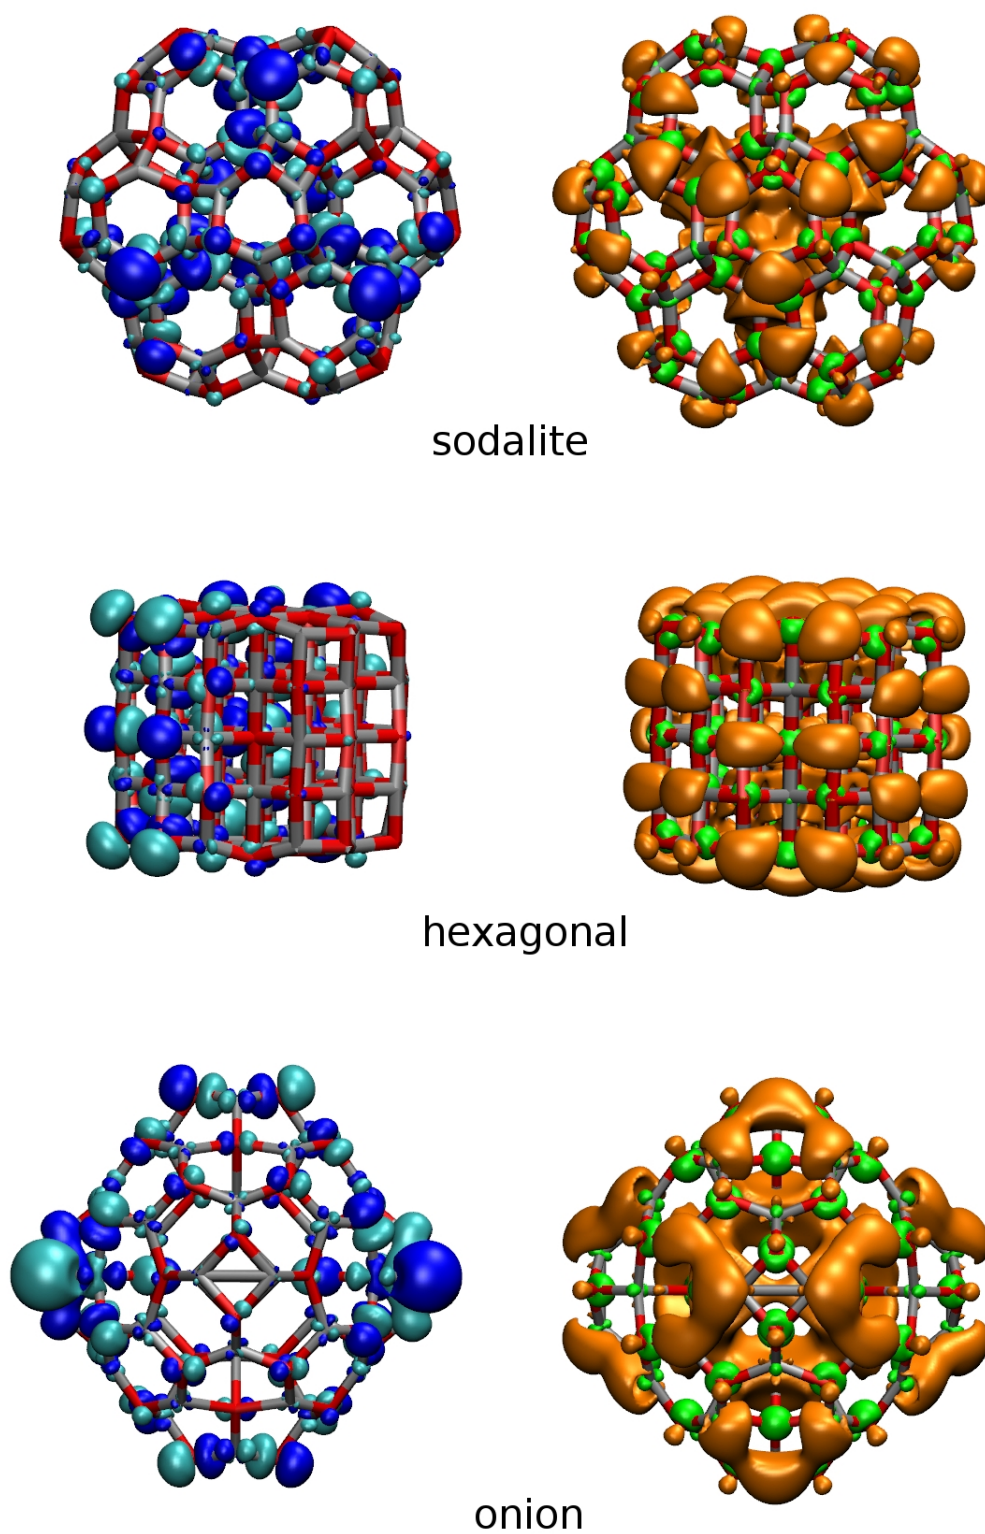

Figure 4: Orbital spatial localization (HOMO left, LUMO right) of the sodalite, hexagonal and onion isomers.



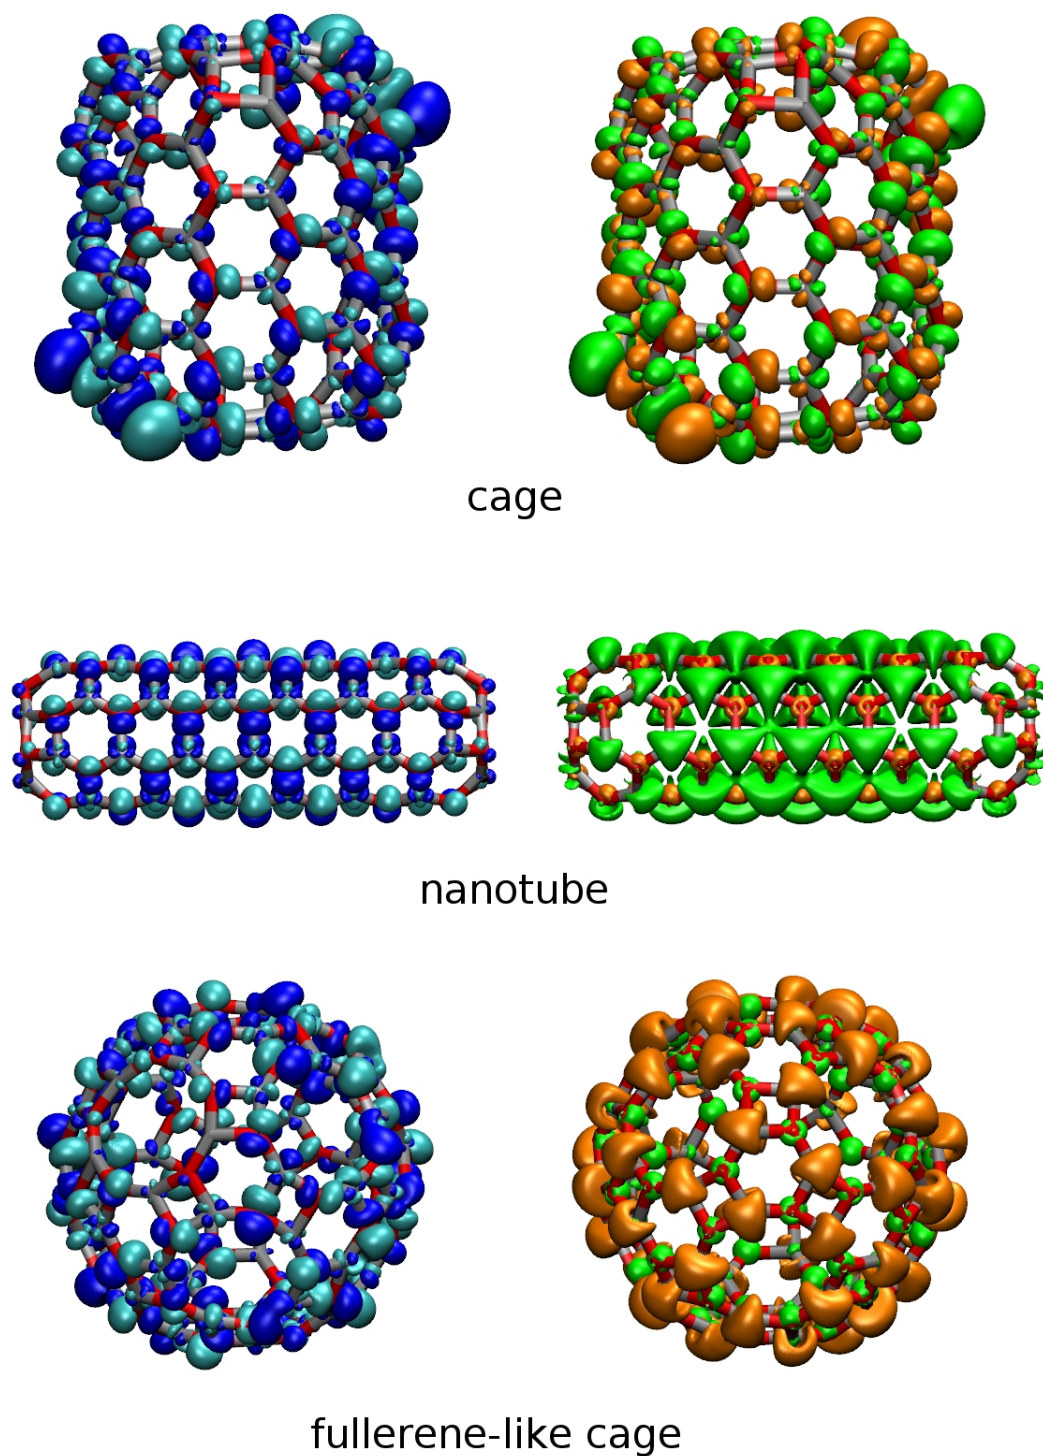

Figure 5: Orbital spatial localization (HOMO left, LUMO right) of the cage, nanotube and fullerene-like cage isomers.



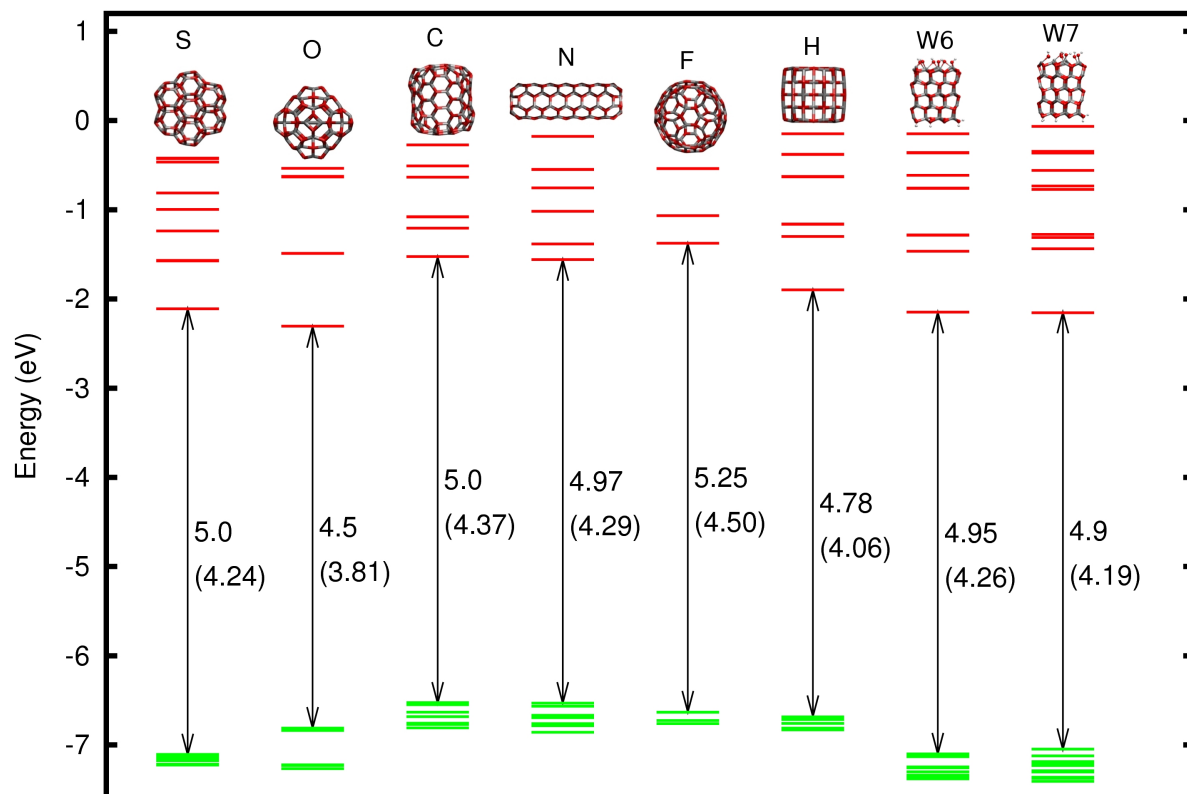

Figure 6: First ten occupied and unoccupied levels as obtained with the modified B3LYP functional. The values in parenthesis correspond to the TDDFT optical gap. Capital letters on top refer to different isomers as follows: S=sodalite, H=hexagonal, O=onion, C=cage, N=nanotube, F=fullerene-like cage, W6= hexagonal saturated with 6 water molecules, W7= hexagonal saturated with 7 water molecules.

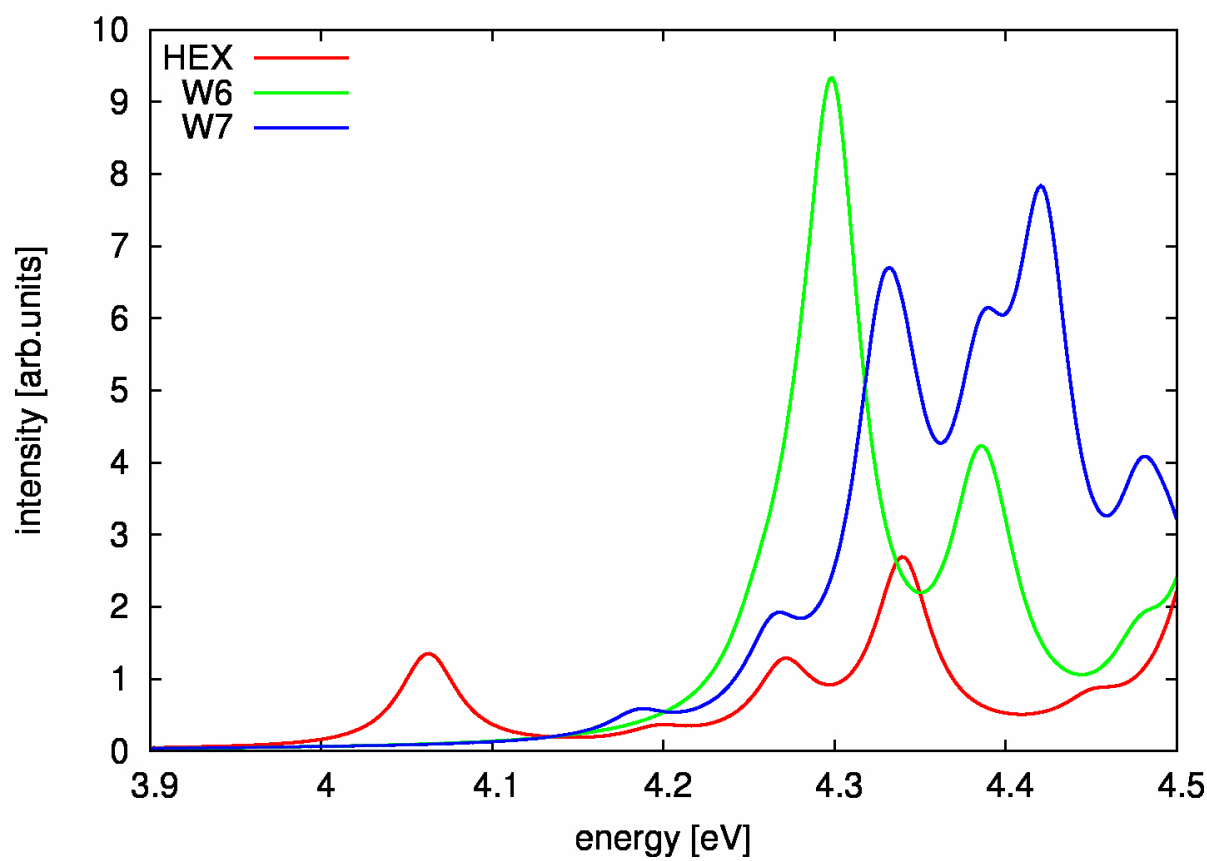

Figure 7: Comparison between the optical absorption spectra of the unsaturated hexagonal cluster and its two saturated counterparts.

Full reference for Ref. 41:

Gaussian 09, Revision A.02, M. J. Frisch, G. W. Trucks, H. B. Schlegel, G. E. Scuseria, M. A. Robb, J. R. Cheeseman, G. Scalmani, V. Barone, B. Mennucci, G. A. Petersson, H. Nakatsuji, M. Caricato, X. Li, H. P. Hratchian, A. F. Izmaylov, J. Bloino, G. Zheng, J. L. Sonnenberg, M. Hada, M. Ehara, K. Toyota, R. Fukuda, J. Hasegawa, M. Ishida, T. Nakajima, Y. Honda, O. Kitao, H. Nakai, T. Vreven, J. A. Montgomery, Jr., J. E. Peralta, F. Ogliaro, M. Bearpark, J. J. Heyd, E. Brothers, K. N. Kudin, V. N. Staroverov, R. Kobayashi, J. Normand, K. Raghavachari, A. Rendell, J. C. Burant, S. S. Iyengar, J. Tomasi, M. Cossi, N. Rega, J. M. Millam, M. Klene, J. E. Knox, J. B. Cross, V. Bakken, C. Adamo, J. Jaramillo, R. Gomperts, R. E. Stratmann, O. Yazyev, A. J. Austin, R. Cammi, C. Pomelli, J. W. Ochterski, R. L. Martin, K. Morokuma, V. G. Zakrzewski, G. A. Voth, P. Salvador, J. J. Dannenberg, S. Dapprich, A. D. Daniels, Ö. Farkas, J. B. Foresman, J. V. Ortiz, J. Cioslowski, and D. J. Fox, Gaussian, Inc., Wallingford CT, 2009.

## References

- (1) Smith, W.; Todorov, I. T. *J. Mol. Graph.* **1996**, *14*, 136.
- (2) Binks, D. J.; Grimes, R. W. *Journal of the American Ceramic Society* **1993**, *76*, 2370–2372.
- (3) Kullkarni, A. J.; Zhou, M.; Ke, F. J. *Nanotechnology* **2005**, *16*, 2749–2756.
- (4) Eichkorn, K.; Treutler, O.; Ohm, H.; Haser, M.; Ahlrichs, R. *Chem. Phys. Lett* **1995**, *240*, 283–289.
- (5) Sierka, M.; Hogekamp, A.; Ahlrichs, R. *J. Chem. Phys.* **2003**, *118*, 9136–9148.
- (6) Treutler, O.; Ahlrichs, R. *J. Chem. Phys.* **1995**, *102*, 346–354.
- (7) Bauschlicher, C. W.; Partridge, H. *J. Chem. Phys.* **1998**, *109*, 8430–8434.
- (8) Wang, B.; Wang, X.; Zhao, J. *J. Phys. Chem. C* **2010**, *114*, 5741–5744.

- (9) Wang, B.; Nagase, S.; Zhao, J.; Wang, G. *The Journal of Physical Chemistry C* **2007**, *111*, 4956–4963.
- (10) Clemmer, D. E.; Dalleska, N. F.; Armentrout, P. B. *J. Chem. Phys.* **1991**, *95*, 7263–7268.
- (11) Fancher, C. A.; de Clercq, H. L.; Thomas, O. C.; Robinson, D. W.; Bowen, K. H. *J. Chem. Phys.* **1998**, *109*, 8426–8429.
